# Supplementary material for: Comparison of the Efficacy and Safety of Intravitreal Conbercept with Intravitreal Ranibizumab for Treatment of Diabetic Macular Edema: A Meta-Analysis
Source: Hindawi journal article supplement (doi:10.1155/2020/5809081), 2020-03-23

Figure S1

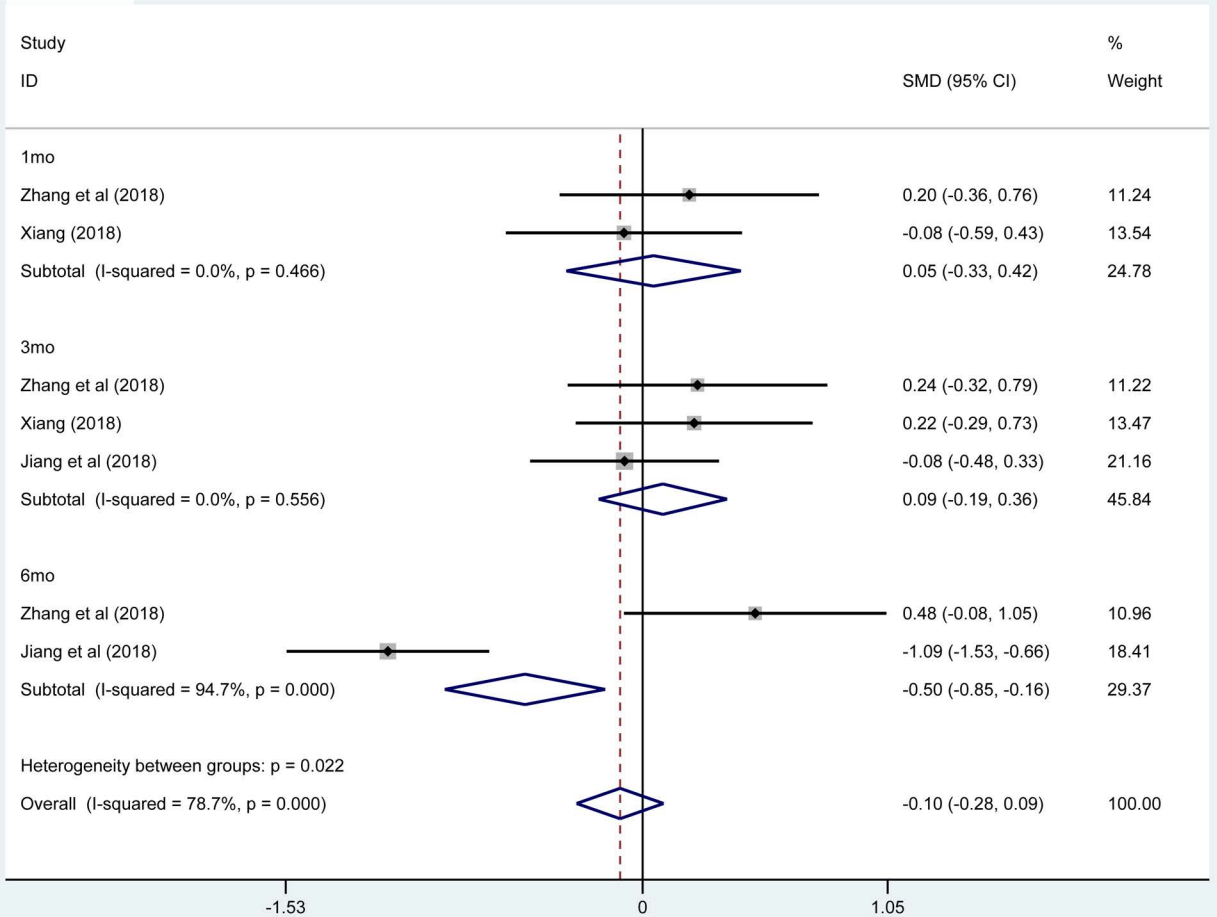

Figure S2

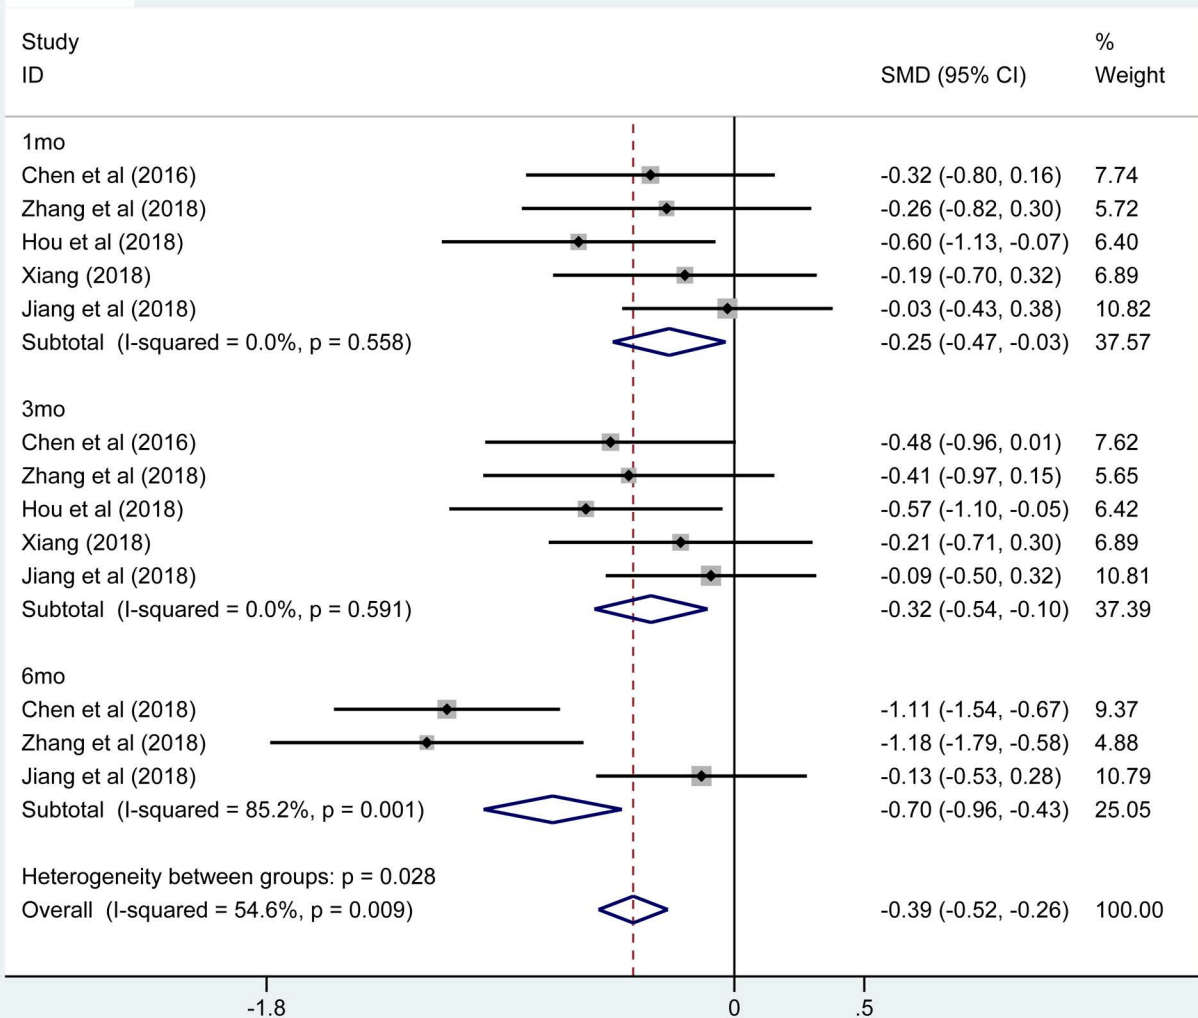

Supplement: f1 [file 5809081.f1.pdf]
